# Supplementary material for: Synthesis and characterization of surface ion-imprinted polymer based on SiO2-coated graphene oxide for selective adsorption of uranium(vi)
Source: Royal Society of Chemistry journal article supplement (doi:10.1039/c5ra11149h), 2015-01-01
Supplement: c5ra11149h1.pdf [file c5ra11149h1.pdf]

Electronic supplementary information for

## Synthesis and characterization of surface ion-imprinted polymer based on SiO<sub>2</sub>-coated graphene oxide for selective adsorption of uranium(VI)

Hu Meng,<sup>ab</sup> Zheng Li,<sup>\*a</sup> Fuyin Ma,<sup>ab</sup> Xiaoning Wang,<sup>ab</sup> Wei Zhou<sup>a</sup> and Lan Zhang<sup>a</sup>

<sup>a</sup>. center for excellence TMSR energy system and CAS Key Lab of Nuclear Radiation and Nuclear Energy Technology, Shanghai Institute of Applied Physics, Chinese Academy of Sciences, Shanghai, 201800, P. R. China. E-mail: [lizheng04@sinap.ac.cn](mailto:lizheng04@sinap.ac.cn); Tel: +86-21-39194693.

<sup>b</sup>. University of Chinese Academy of Sciences, Beijing, 100049, P. R. China

**Table S1** Kinetic parameters for the U(VI) adsorption onto GO/SiO<sub>2</sub>-IIP

| Pseudo-first order                    |                                     |                | Pseudo-second order                   |                                                        |                |
|---------------------------------------|-------------------------------------|----------------|---------------------------------------|--------------------------------------------------------|----------------|
| Q <sub>e1</sub> (mg g <sup>-1</sup> ) | k <sub>1</sub> (min <sup>-1</sup> ) | R <sup>2</sup> | Q <sub>e2</sub> (mg g <sup>-1</sup> ) | k <sub>2</sub> (g mg <sup>-1</sup> min <sup>-1</sup> ) | R <sup>2</sup> |
| 0.0169                                | 0.117                               | 0.8928         | 1.120                                 | 386.99                                                 | 0.9928         |

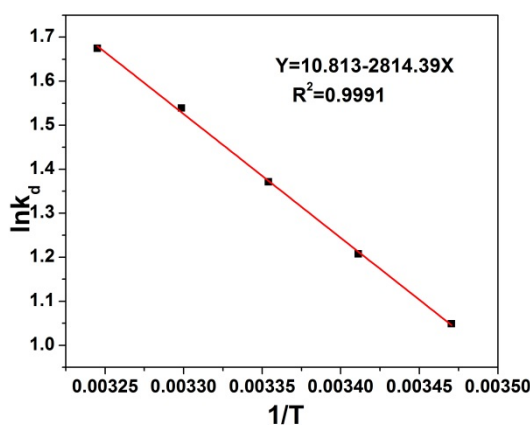

**Fig. S1** Plot of lnK<sub>d</sub> vs. 1/T for the uptake of U(VI) on GO/SiO<sub>2</sub>-IIP (C<sub>0</sub>=5 mg L<sup>-1</sup>, pH=4.0, t = 7min, W = 10mg and V =20 mL).

**Table S2** Langmuir and Freundlich isotherm parameters for sorption of U(VI) by GO/SiO<sub>2</sub>-IIP and GO/SiO<sub>2</sub>-NIP

|                          | Langmuir model                      |                                      |                | Freundlich model |       |                |
|--------------------------|-------------------------------------|--------------------------------------|----------------|------------------|-------|----------------|
|                          | K <sub>L</sub> (L g <sup>-1</sup> ) | Q <sub>m</sub> (mg g <sup>-1</sup> ) | R <sup>2</sup> | k <sub>F</sub>   | n     | R <sup>2</sup> |
| GO/SiO <sub>2</sub> -IIP | 0.1886                              | 17.89                                | 0.9982         | 5.889            | 4.031 | 0.9782         |
| GO/SiO <sub>2</sub> -NIP | 0.0794                              | 10.32                                | 0.9968         | 1.877            | 2.758 | 0.9787         |

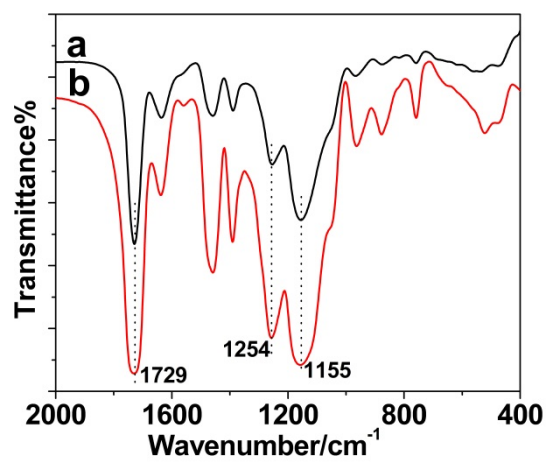

**Fig. S2** FT-IR spectra of GO/SiO<sub>2</sub>-IIP (a) and GO/SiO<sub>2</sub>-IIP after five adsorption-desorption cycles (b).
